# Supplementary material for: Metal substrate engineering to modulate CO2 hydrogenation to methanol on inverse Zr3O6/CuPd catalysts
Source: Royal Society of Chemistry journal article supplement (doi:10.1039/d4cp00927d), 2024-01-01
Supplement: d4cp00927d1.pdf [file d4cp00927d1.pdf]

## Metal Substrate Engineering to Modulate CO<sub>2</sub> Hydrogenation to Methanol on Inverse Zr<sub>3</sub>O<sub>6</sub>/CuPd Catalysts

Bin Qin<sup>a#</sup>, XiaoYing Sun<sup>a#</sup>, Jianzhuo Lu<sup>a</sup>, Zhen Zhao<sup>a,b\*</sup>, Bo Li<sup>a\*</sup>

<sup>a</sup>Institute of Catalysis for Energy and Environment, College of Chemistry and Chemical Engineering, Shenyang Normal University, Shenyang 110034, China

<sup>b</sup>State Key Laboratory of Heavy Oil Processing, China University of Petroleum, Beijing, 102249, China

Corresponding Authors:

\* B. Li: e-mail, boli@synu.edu.cn

\* Z. Zhao: email, zhenzhao@cup.edu.cn or zhaozhen1586@163.com

#: These authors contributed equally to this work

**Table S1** The details of setup for construction of Z/CuPd models.

| parameters<br>catalysts | Supercell | Atom<br>Layers | Fixed Layers | Vacuum Gap |
|-------------------------|-----------|----------------|--------------|------------|
| Z/CuPd(100)-Cu          | 5×5       | 4              | bottom 2     | 12Å        |
| Z/CuPd(100)-Pd          | 5×5       | 4              | bottom 2     | 12Å        |
| Z/CuPd(110)             | 5×4       | 4              | bottom 2     | 11Å        |
| Z/CuPd(111)-Cu          | 4×4       | 8              | bottom 4     | 12Å        |
| Z/CuPd(111)-Pd          | 4×4       | 8              | bottom 4     | 12Å        |

**Table S2** Bader charge analysis(in |e|) of CO<sub>2</sub> adsorbed on Zr<sub>3</sub>O<sub>6</sub>/CuPd catalysts.

|                       | Z/CuPd(100)<br>-Cu | Z/CuPd(100)<br>- Pd | Z/CuPd(110) | Z/CuPd(111)<br>- Cu | Z/CuPd(111)<br>- Pd |
|-----------------------|--------------------|---------------------|-------------|---------------------|---------------------|
| O <sub>1</sub> (Zr)   | -1.10              | -1.12               | -1.12       | -1.11               | -1.11               |
| O <sub>2</sub> (CuPd) | -1.04              | -1.00               | -1.07       | -1.04               | -1.02               |
| C                     | 1.22               | 1.44                | 1.45        | 1.45                | 1.56                |
| total                 | -0.92              | -0.68               | -0.74       | -0.70               | -0.57               |

**Table S3** Adsorption energies of key intermediates involved in methanol synthesis progress over Zr<sub>3</sub>O<sub>6</sub>/CuPd catalysts.

| catalysts<br>species | Z/CuPd(100)-<br>Cu | Z/CuPd(100)-<br>Pd | Z/CuPd(110) | Z/CuPd(111)-<br>Cu | Z/CuPd(111)-<br>Pd |
|----------------------|--------------------|--------------------|-------------|--------------------|--------------------|
|                      | H                  | -2.86              | -2.72       | -2.90              | -2.82              |
| O                    | -6.28              | -5.45              | -5.67       | -6.32              | -5.88              |
| H <sub>2</sub>       | -0.31              | -0.33              | -0.44       | -0.37              | -0.50              |
| CO <sub>2</sub>      | -1.51              | -1.65              | -1.67       | -1.42              | -1.73              |

|                     |       |       |       |       |       |
|---------------------|-------|-------|-------|-------|-------|
| CO                  | -1.23 | -2.36 | -2.61 | -1.59 | -2.23 |
| OH                  | -5.47 | -4.95 | -5.39 | -5.48 | -5.28 |
| HCOO                | -4.65 | -4.39 | -4.66 | -4.99 | -4.81 |
| COOH                | -3.93 | -4.00 | -4.00 | -4.20 | -4.37 |
| HCOOH               | -1.62 | -1.68 | -2.02 | -1.56 | -1.73 |
| CH <sub>2</sub> OOH | -4.63 | -4.26 | -4.47 | -4.73 | -4.54 |
| HCO                 | -3.60 | -3.65 | -4.04 | -3.69 | -4.01 |
| CH <sub>2</sub> O   | -2.20 | -2.20 | -2.53 | -2.37 | -2.54 |
| CH <sub>3</sub> O   | -4.75 | -4.23 | -4.70 | -4.69 | -4.50 |
| CH <sub>2</sub> OH  | -3.29 | -3.15 | -3.25 | -3.26 | -3.48 |
| CH <sub>3</sub> OH  | -1.56 | -1.55 | -1.87 | -1.59 | -1.56 |
| H <sub>2</sub> O    | -1.29 | -1.30 | -1.63 | -1.33 | -1.46 |

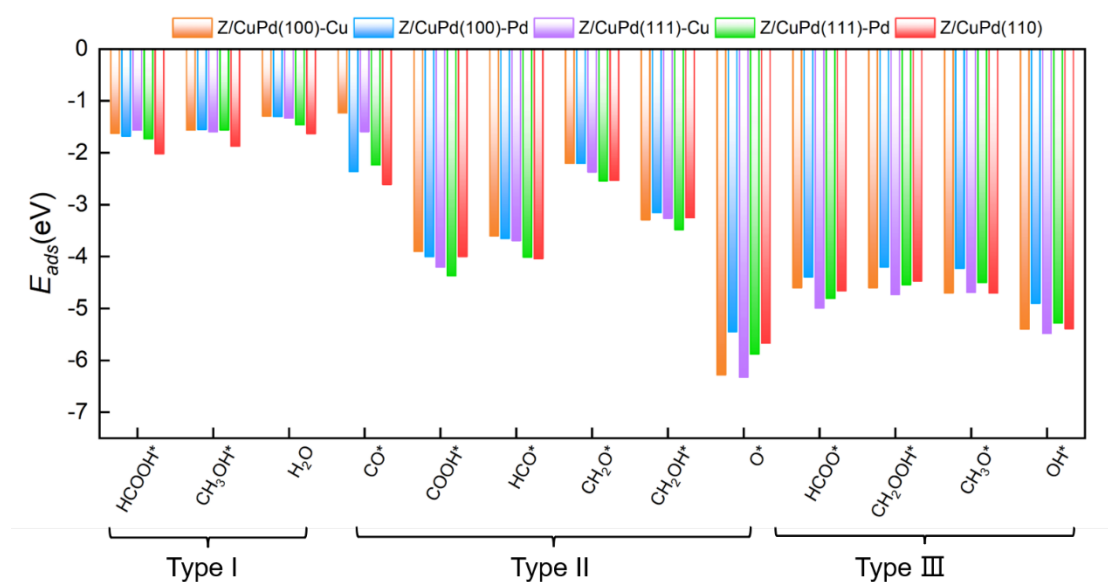

**Figure S1** Histogram of adsorption energies of key intermediates in the methanol synthesis process.

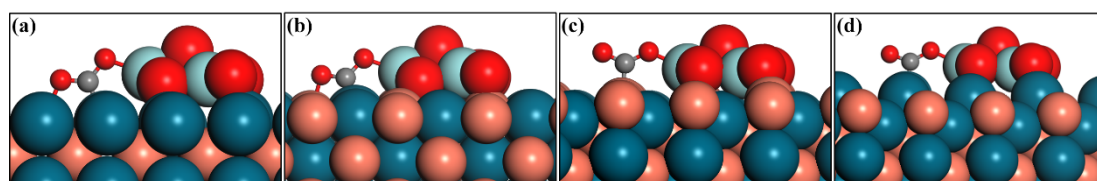

**Figure S2** DFT optimized geometry configuration of CO<sub>2</sub> adsorbed on (a) Z/CuPd(100)-Pd (b) Z/CuPd(110) (c) Z/CuPd(111)-Cu (d) Z/CuPd(111)-Pd

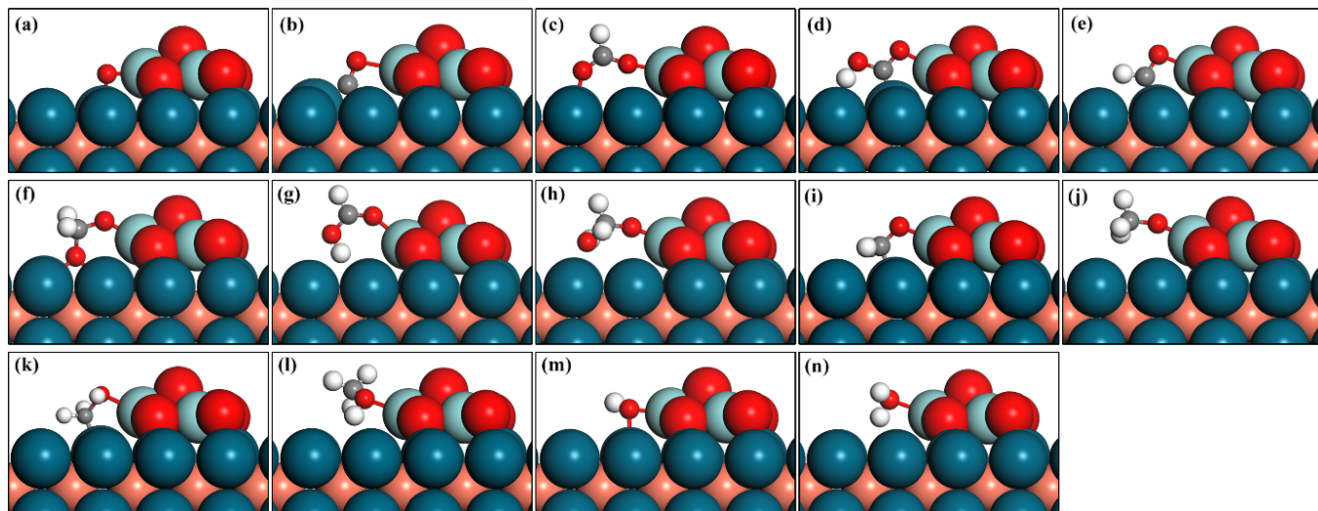

**Figure S3** Side views of the optimized structures of key intermediates adsorbed on Z/PdCu(100)-Pd (a) O\* (b) CO\* (c) HCOO\* (d) COOH\* (e) HCO\* (f) CH<sub>2</sub>OO\* (g) HCOOH\* (h) CH<sub>2</sub>OOH\* (i) CH<sub>2</sub>O\* (j) CH<sub>3</sub>O\* (k) CH<sub>2</sub>OH\* (l) CH<sub>3</sub>OH\* (m) OH\* (n)H<sub>2</sub>O\*

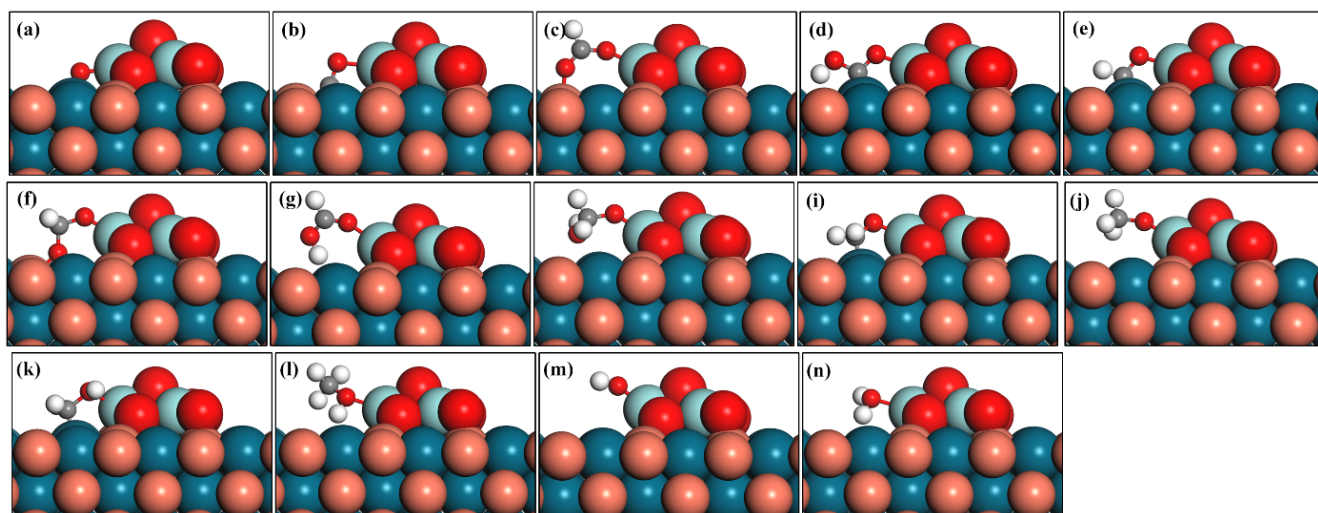

**Figure S4** Side views of the optimized structures of key intermediates adsorbed on Z/PdCu(110) (a) O\* (b) CO\* (c) HCOO\* (d) COOH\* (e) HCO\* (f) CH<sub>2</sub>OO\* (g) HCOOH\* (h) CH<sub>2</sub>OOH\* (i) CH<sub>2</sub>O\* (j) CH<sub>3</sub>O\* (k) CH<sub>2</sub>OH\* (l) CH<sub>3</sub>OH\* (m) OH\* (n)H<sub>2</sub>O\*

CH<sub>2</sub>O\* (j) CH<sub>3</sub>O\* (k) CH<sub>2</sub>OH\* (l) CH<sub>3</sub>OH\* (m) OH\* (n)H<sub>2</sub>O\*

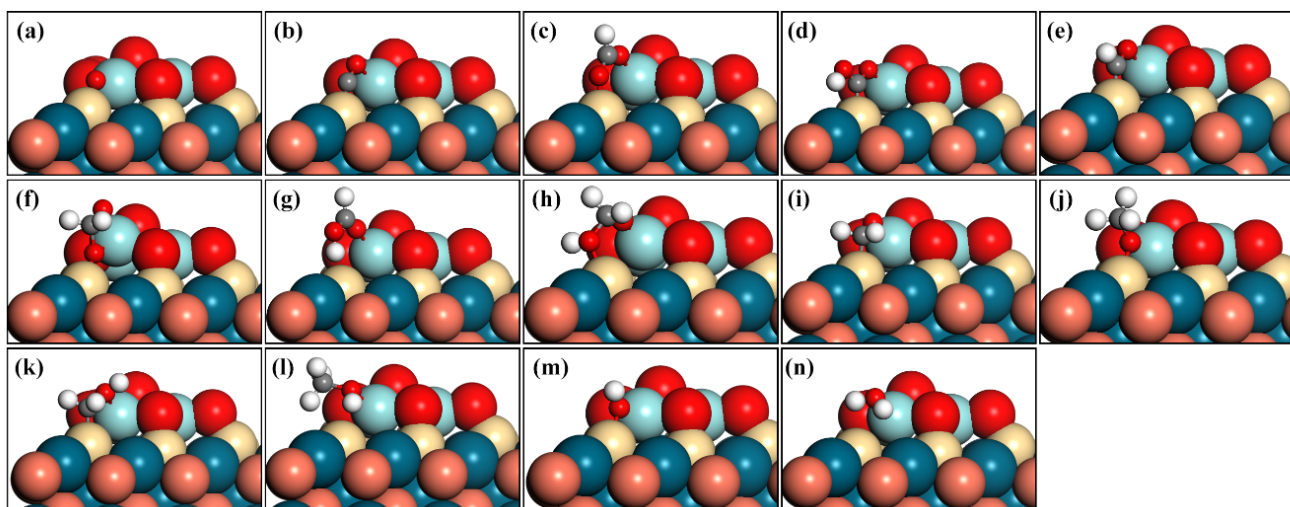

**Figure S5** Side views of the optimized structures of key intermediates adsorbed on Z/PdCu(111)-Cu (a) O\* (b) CO\* (c) HCOO\* (d) COOH\* (e) HCO\* (f) CH<sub>2</sub>OO\* (g) HCOOH\* (h) CH<sub>2</sub>OOH\* (i) CH<sub>2</sub>O\* (j) CH<sub>3</sub>O\* (k) CH<sub>2</sub>OH\* (l) CH<sub>3</sub>OH\* (m) OH\* (n)H<sub>2</sub>O\*

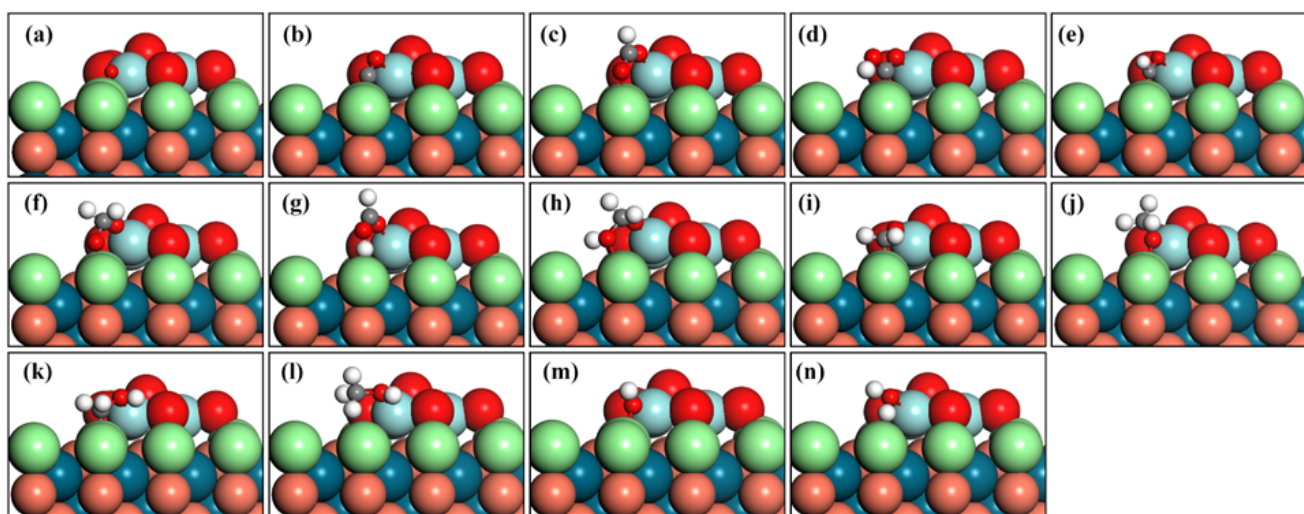

**Figure S6** Side views of the optimized structures of key intermediates adsorbed on Z/PdCu(111)-Pd (a) O\* (b) CO\* (c) HCOO\* (d) COOH\* (e) HCO\* (f) CH<sub>2</sub>OO\* (g) HCOOH\* (h) CH<sub>2</sub>OOH\* (i) CH<sub>2</sub>O\* (j) CH<sub>3</sub>O\* (k) CH<sub>2</sub>OH\* (l) CH<sub>3</sub>OH\* (m) OH\* (n)H<sub>2</sub>O\*

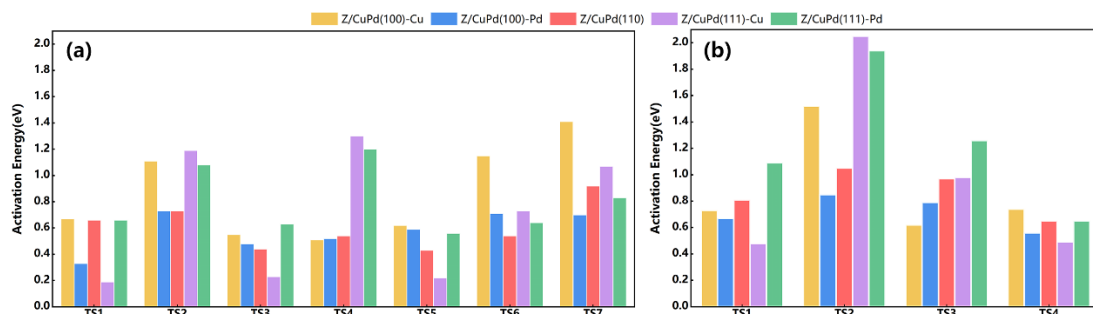

Figure S7 The lowest energy barrier along (a) Formate pathway (b) RWGS+CO-hydro pathway.

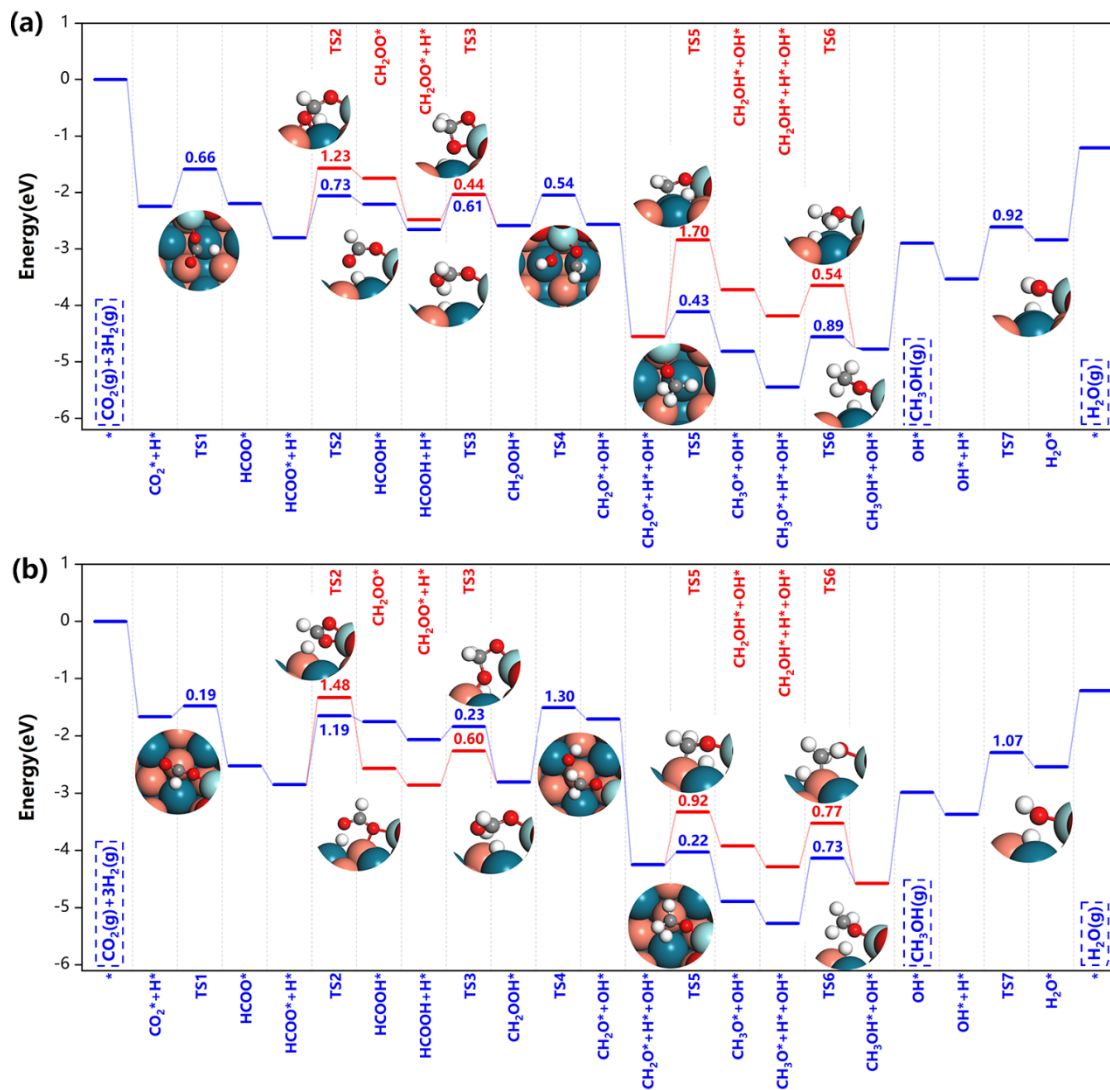

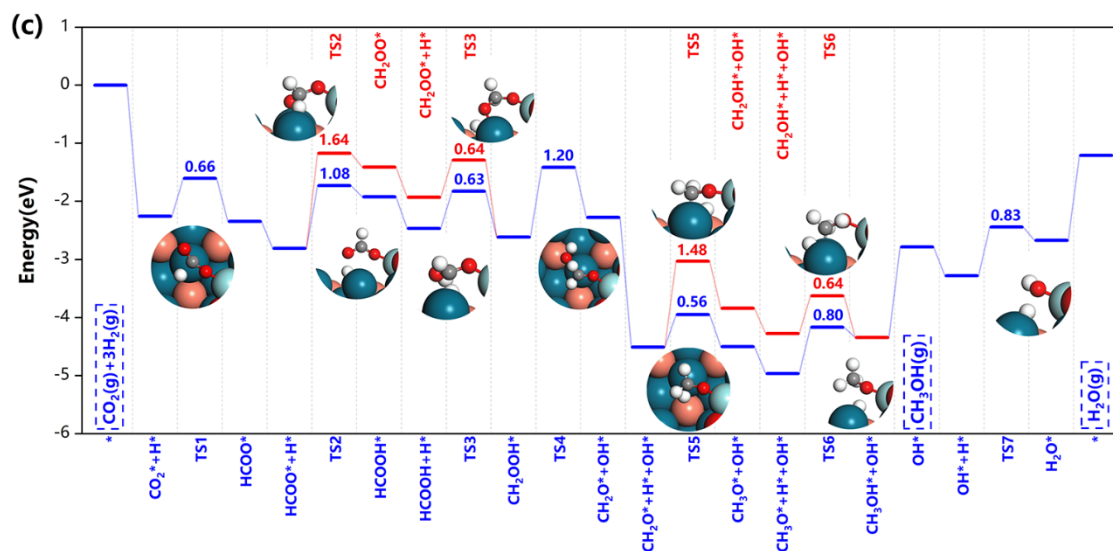

**Figure S8** Potential energy diagrams and corresponding transition state structures of methanol formation over (a) Z/CuPd(110) (b) Z/CuPd(111)-Cu (c) Z/CuPd(111)-Pd along formate pathway.

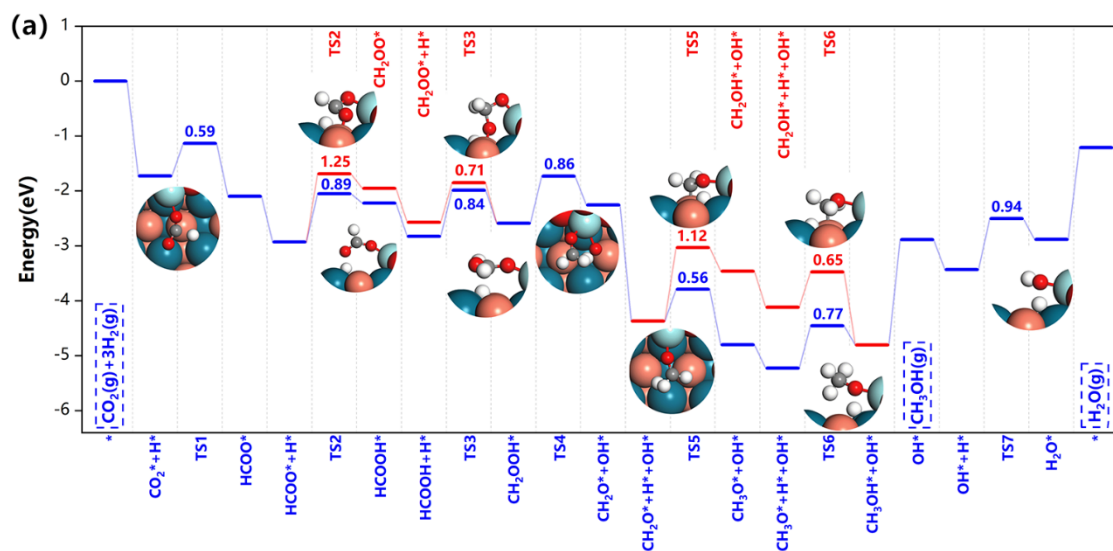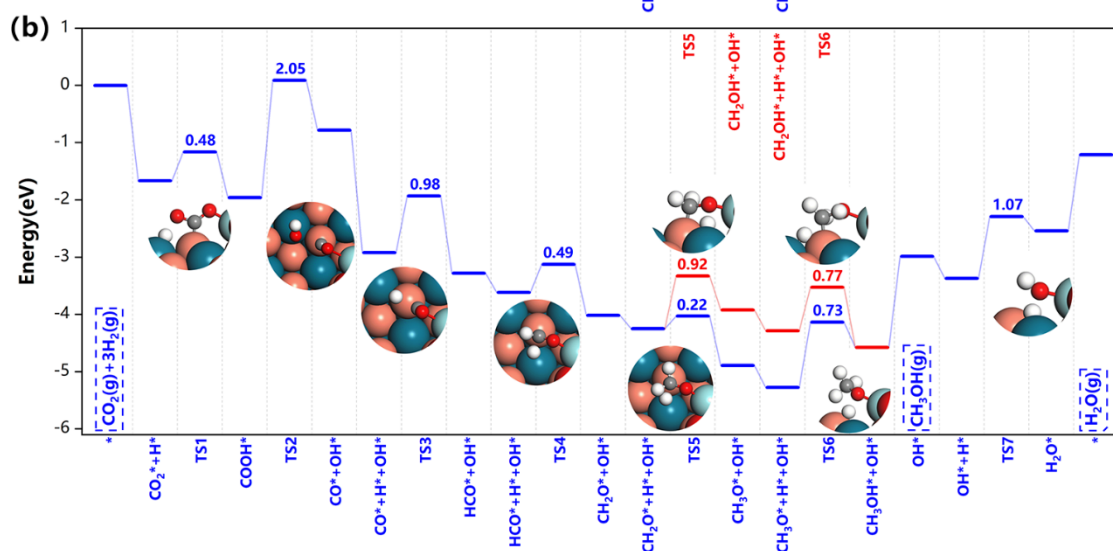

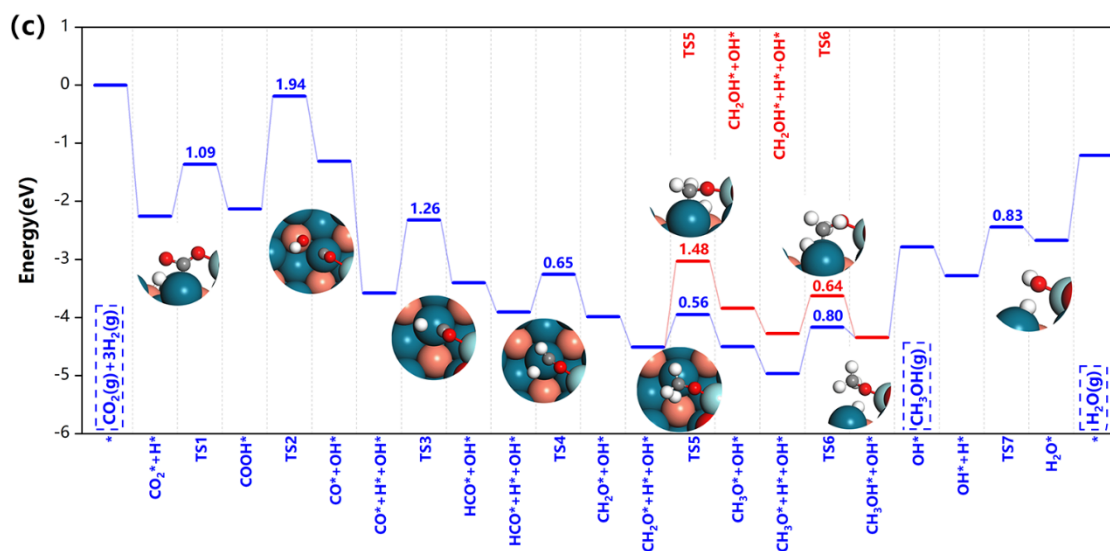

**Figure S9** Potential energy diagrams and corresponding transition state structures of methanol formation over (a) Z/CuPd(110) (b) Z/CuPd(111)-Cu (c) Z/CuPd(111)-Pd along RWGS + CO-hydro pathway.

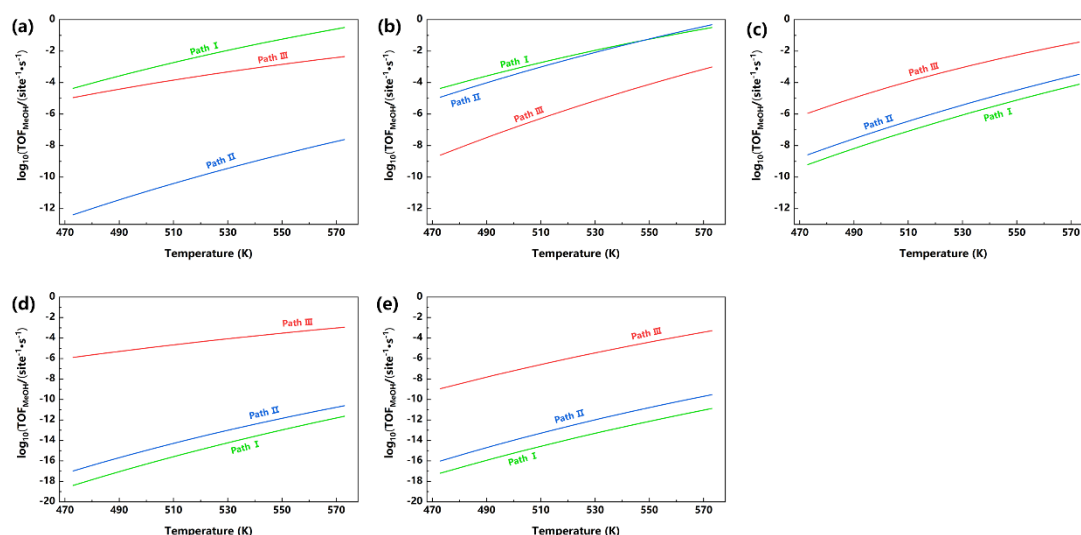

**Figure S10** The calculated logarithm turnover frequency (TOF) of MeOH formation pathways over (a) Z/CuPd(100)-Cu (b) Z/CuPd(100)-Pd (c) Z/CuPd(110) (d) Z/CuPd(111)-Cu and (e) Z/CuPd(111)-Pd at reactant pressure of 5 bar.

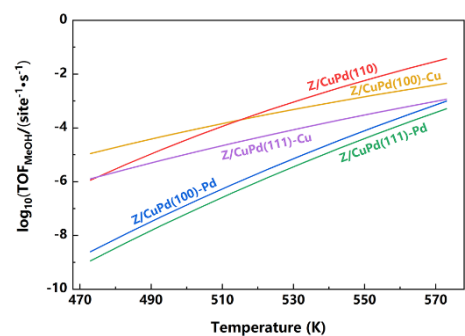

**Figure S11** The logarithm turnover frequency (TOF) of CO<sub>2</sub> direct activation pathway over Zr<sub>3</sub>O<sub>6</sub>/CuPd catalysts.
